# Supplementary material for: New benzoxazines containing polyhedral oligomeric silsesquioxane from eugenol, guaiacol and vanillin
Source: Royal Society of Chemistry journal article supplement (doi:10.1039/c4nj02047b), 2014-12-09
Supplement: c4nj02047b1.pdf [file c4nj02047b1.pdf]

†Electronic Supplementary Information (ESI) available: See

DOI: 10.1039/b000000x/

## New Benzoxazines Containing Polyhedral Oligomeric Silsesquioxane from Eugenol, Guaiacol and Vanillin

Thirukumaran Periyasamy, ShakilaParveen Asrafali and Sarojadevi Muthusamy\*

Department of Chemistry, Anna University, Chennai-600 025, Tamilnadu, India. Fax: 044 2235 8651; Tel: 044 2235 8665; E-mail: tkpchem30@gmail.com

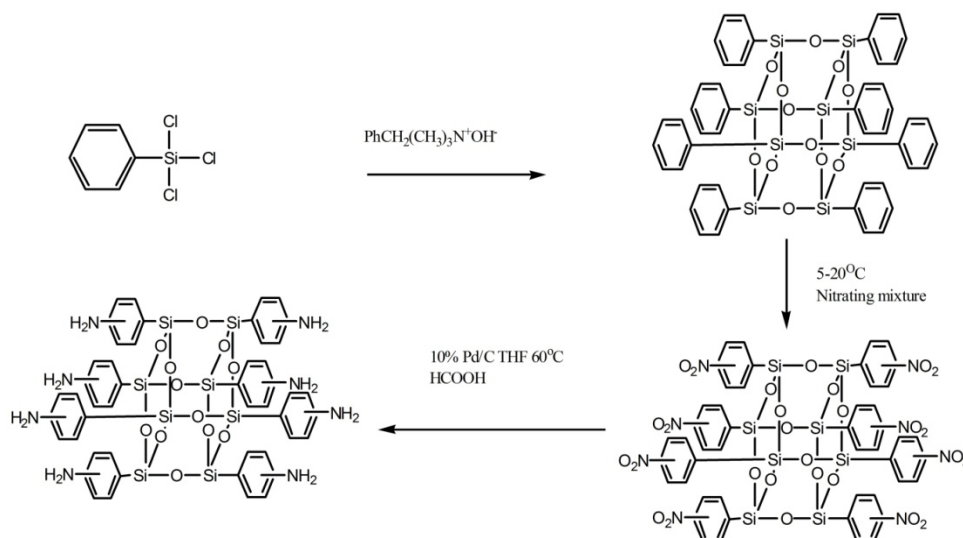

Scheme S1: Synthesis of amine functionalized POSS

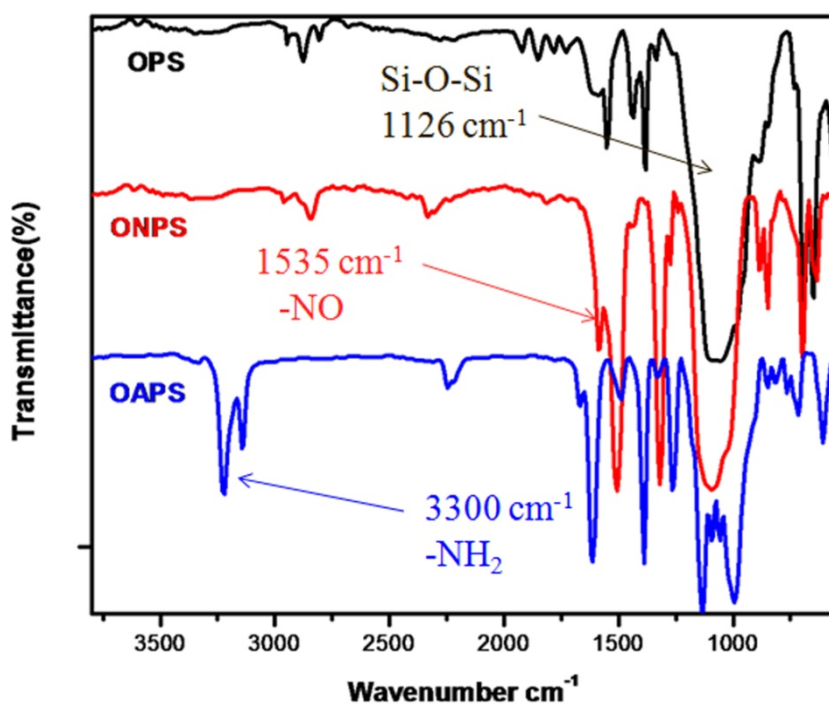

Figure S1 FT-IR spectra of OPS, ONPS and OAPS

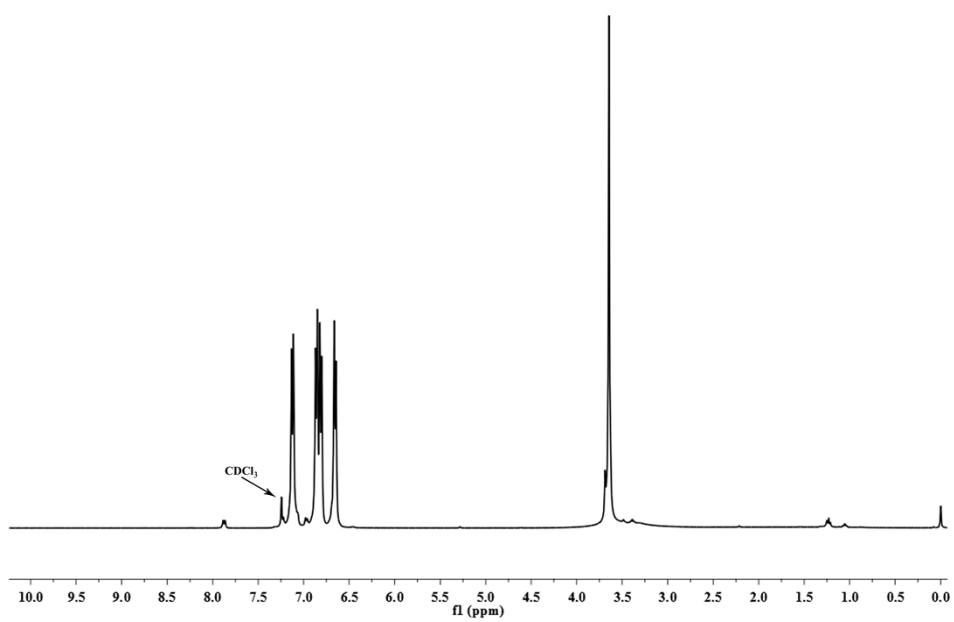

**Figure S2  $^1\text{H-NMR}$  spectrum of OAPS**

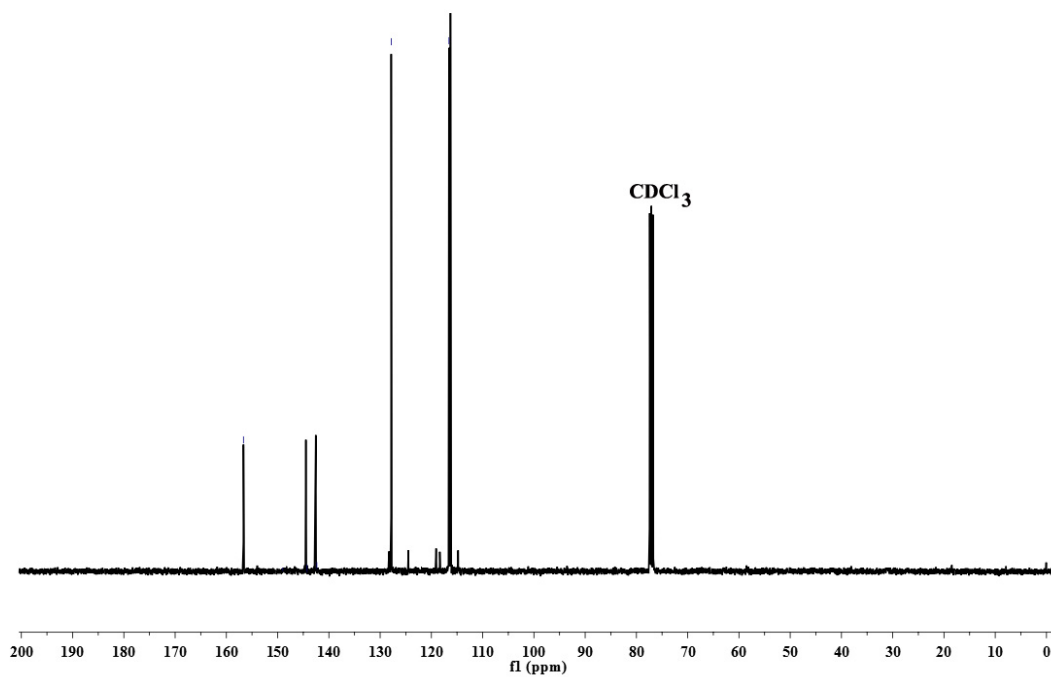

**Figure S3  $^{13}\text{C-NMR}$  spectrum of OAPS**

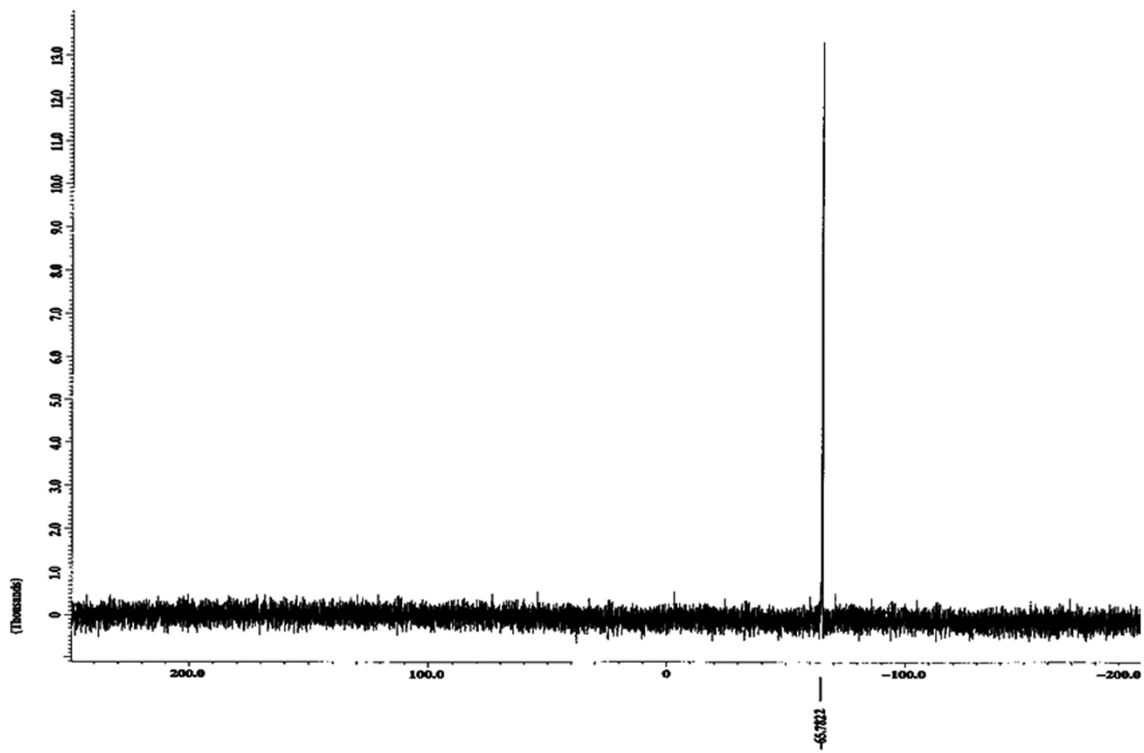

Figure S3  $^{29}\text{Si}$ -NMR spectrum of OAPS
